# Supplementary material for: Biological Role of Tumor/Stromal CXCR4-CXCL12-CXCR7 in MITO16A/MaNGO-OV2 Advanced Ovarian Cancer Patients
Source: MDPI journal article supplement (doi:10.3390/cancers14071849), 2022-04-06
Supplement: s1 [file s1]

# Supplementary Material

## Supplementary Figures

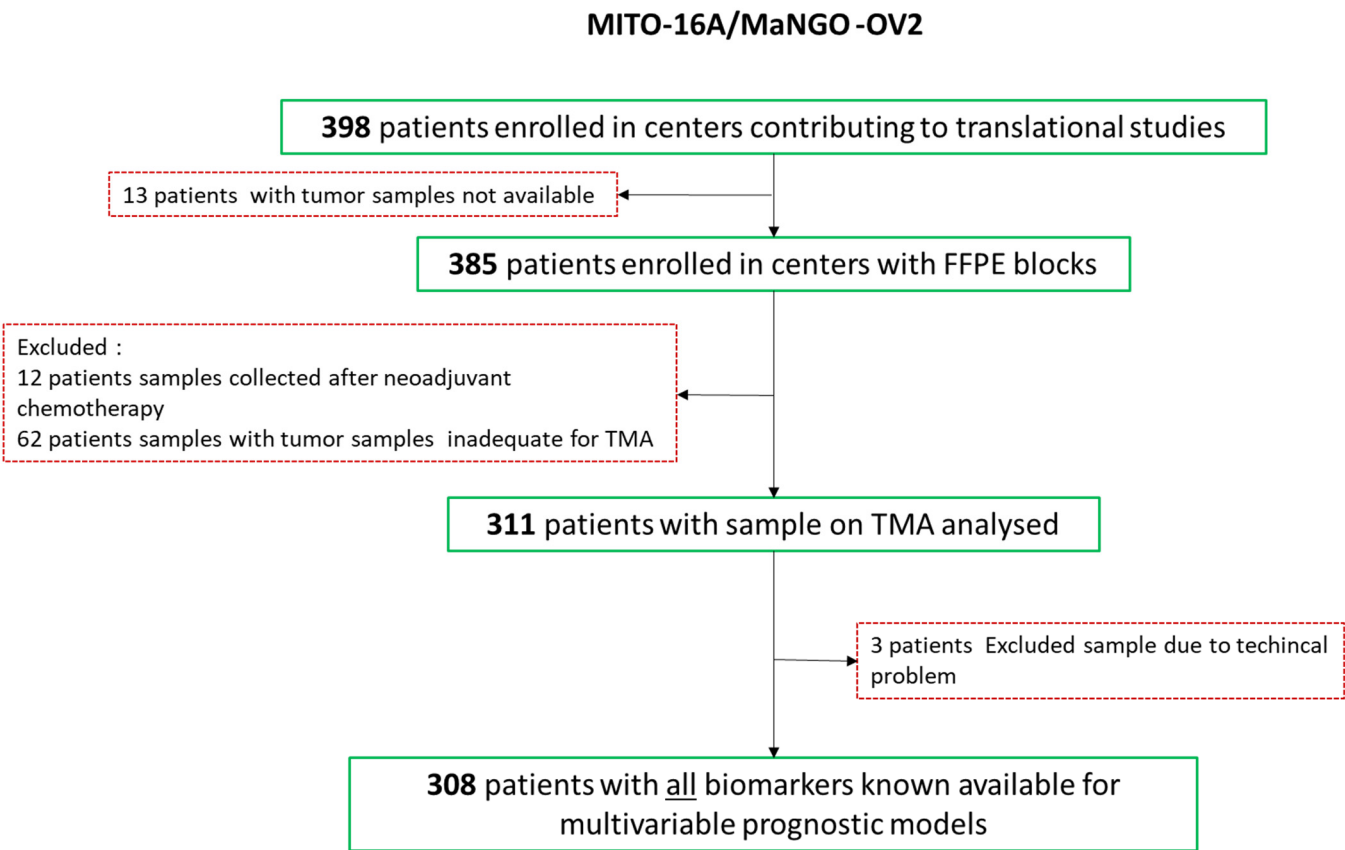

**Figure S1.** Flow chart of inclusion and exclusion criteria

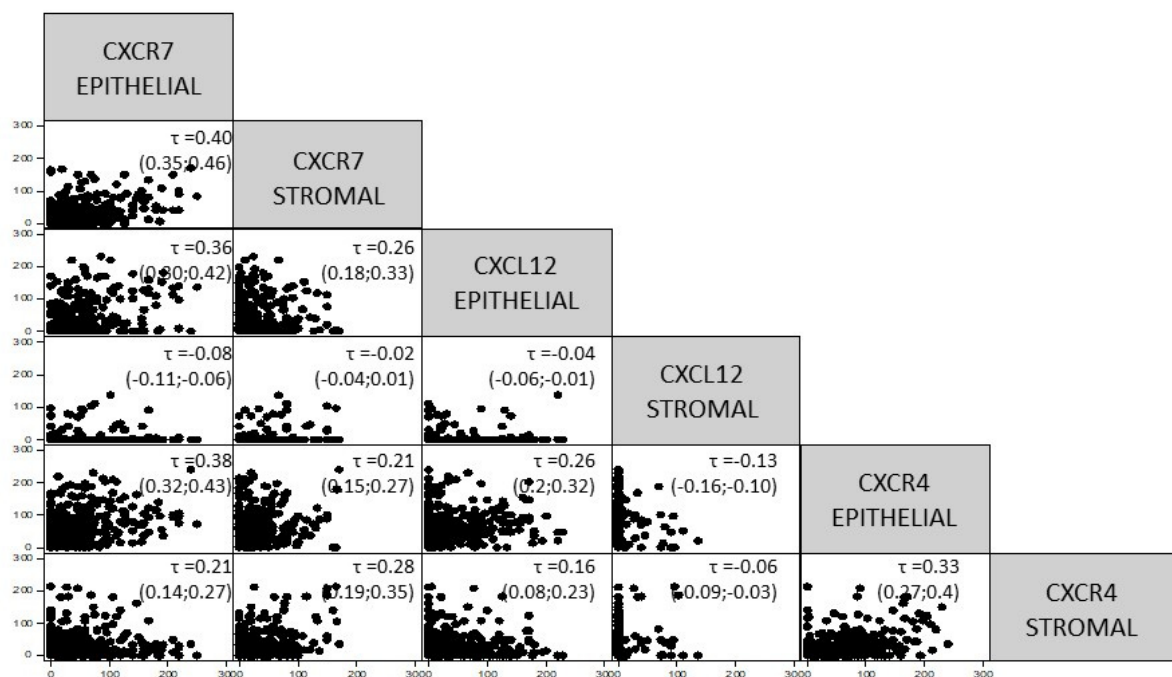

**Figure S2.** Correlation tested by Kendall test modified for zero inflated Wilcoxon rank test (ZIW) for zero-inflated data with permutations (except for Residual Disease where Kruskal-Wallis zero inflated (ZIKW) was applied).

**PFS**

**CXCR7**

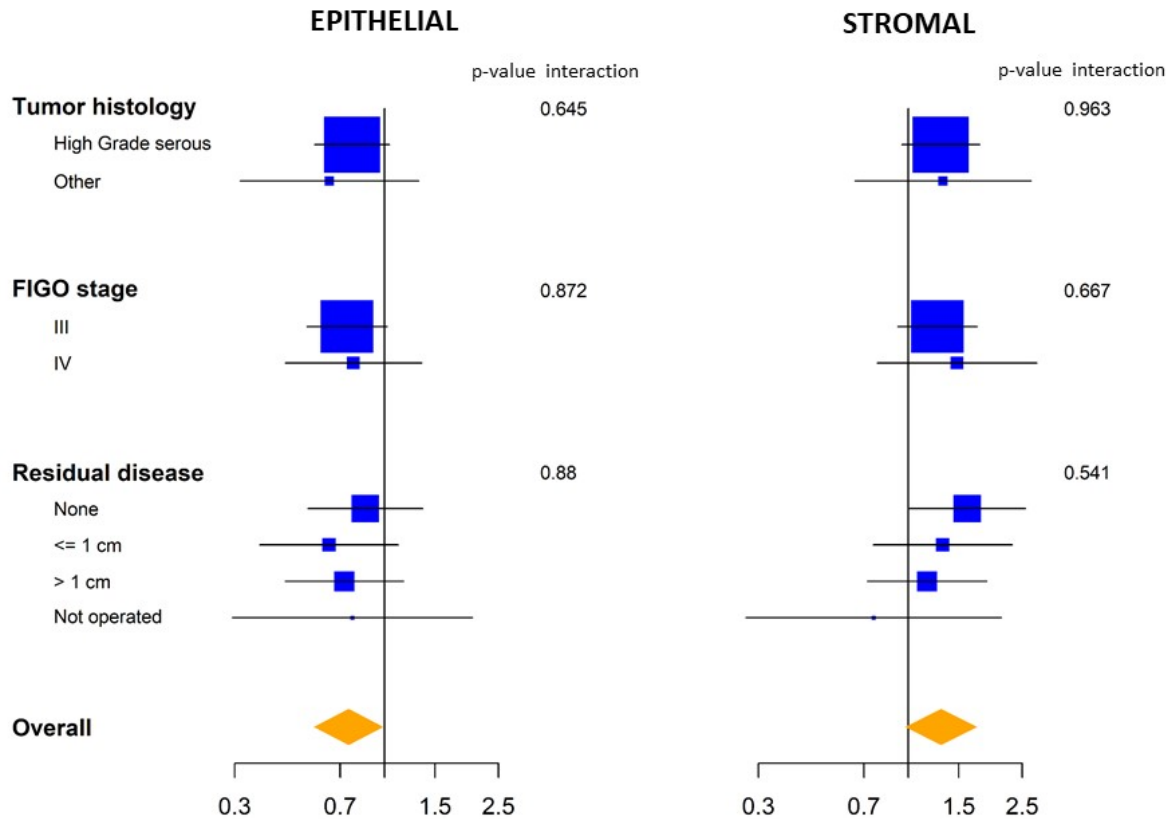

**Figure S3.** Forest plot of hazard ratios (HR) of progression, and 95% CI, evaluated in different subgroups (Cox proportional hazards model analysis) and interaction comparison between prognostic factor and CXCR7 in epithelial and stromal cells. The x-axis represents the Odds ratio on a log scale with the reference vertical line, Odds ratios (square) and 95% CI (whiskers).

PFS

CXCR4

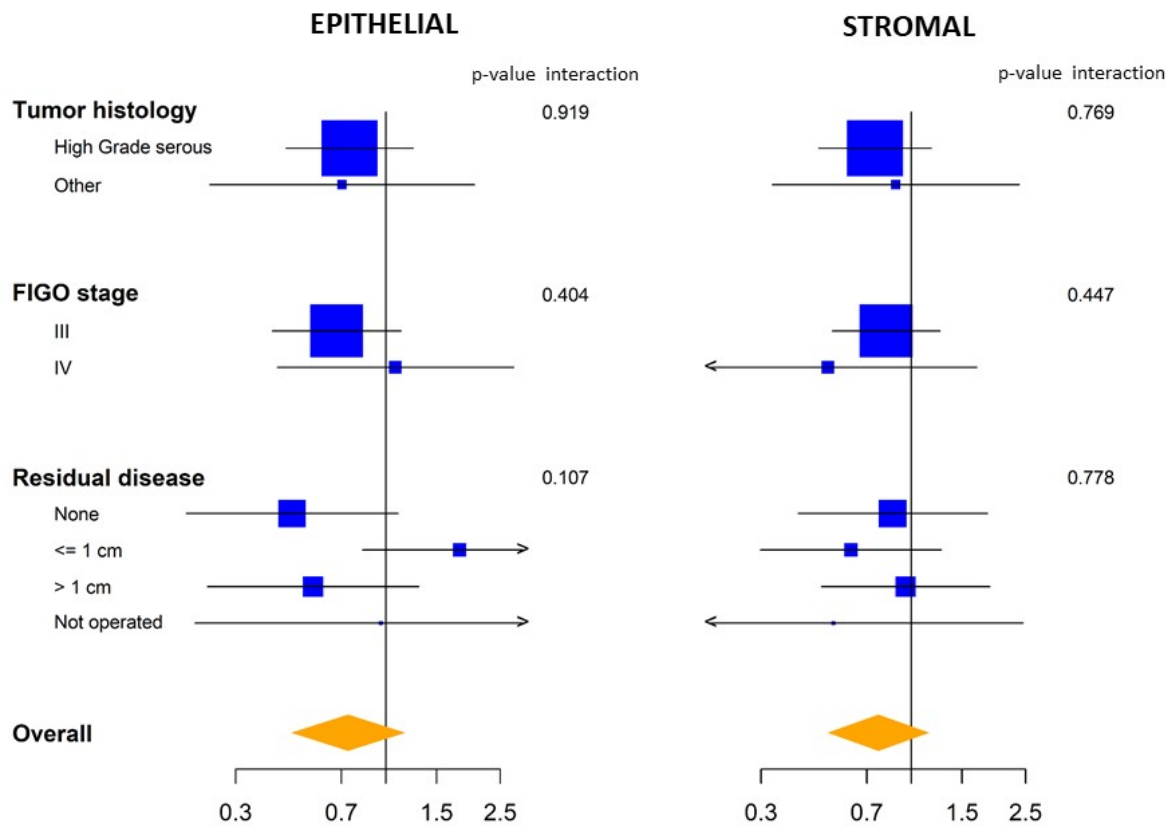

**Figure S4.** Forest plot of hazard ratios (HR) of progression and 95% CI, evaluated in different subgroups (Cox proportional hazards model analysis) and interaction comparison between prognostic factor and CXCR4 in epithelial and stromal cells. The x-axis represents the Odds ratio on a log scale with the reference vertical line, Odds ratios (square) and 95% CI (whiskers).

## Supplementary Tables

**Table S1.** Patients characteristics in translational analysis

|                                      |                  |
|--------------------------------------|------------------|
| <b>Age, median (IQR)</b>             | 58.8 (49.8-65.9) |
| <b>Age elderly, n (%)</b>            |                  |
| <65                                  | 220 (71.4)       |
| ≥65                                  | 88 (28.6)        |
| <b>ECOG performance status, n(%)</b> |                  |
| 0                                    | 247 (80.2)       |
| 1                                    | 53 (17.2)        |
| 2                                    | 8 (2.6)          |
| <b>Residual disease, n(%)</b>        |                  |
| None                                 | 130 (42.2)       |
| ≤ 1 cm                               | 63 (20.5)        |
| > 1 cm                               | 96 (31.2)        |
| Not operated                         | 19 (6.2)         |
| <b>FIGO stage, n(%)</b>              |                  |
| IIIB                                 | 29 (9.4)         |
| IIIC                                 | 219 (71.1)       |
| IV                                   | 60 (19.5)        |
| <b>Tumor histology, n(%)</b>         |                  |
| High Grade serous                    | 264 (85.7)       |
| Low Grade serous                     | 11 (3.6)         |
| Endometrioid                         | 9 (2.9)          |
| Clear Cell                           | 8 (2.6)          |
| Mucinous                             | 2 (0.6)          |
| Mixed                                | 2 (0.6)          |
| Other                                | 12 (3.9)         |
| <b>Location, n(%)</b>                |                  |
| Primitive                            | 233 (75.6)       |
| Metastatic                           | 75 (24.4)        |

**Table S2.** Multivariable analysis of clinical prognostic factors for PFS and OS.

|                                     | PFS (221 events) |             |                  | OS (102 events) |             |                  |
|-------------------------------------|------------------|-------------|------------------|-----------------|-------------|------------------|
|                                     | HR               | (95% CI)    | p                | HR              | (95% CI)    | p                |
| <b>Age elderly</b>                  |                  |             | <b>0.3346</b>    |                 |             | <b>0.2777</b>    |
| <65y                                | 1                | -           |                  | 1               | -           |                  |
| ≥ 65y                               | 0.86             | (0.63-1.17) |                  | 0.78            | (0.49-1.22) |                  |
| <b>ECOG PS</b>                      |                  |             | <b>0.0326</b>    |                 |             | <b>0.0595</b>    |
| 0                                   | 1                | -           |                  | 1               | -           |                  |
| 1                                   | 1.46             | (1.03-2.08) |                  | 1.61            | (0.98-2.66) |                  |
| <b>FIGO stage</b>                   |                  |             | <b>&lt;0.001</b> |                 |             | <b>0.0167</b>    |
| IIIB-IIIC                           | 1                | -           |                  | 1               | -           |                  |
| IV                                  | 2.16             | (1.56-2.98) |                  | 1.75            | (1.11-2.78) |                  |
| <b>Residual disease</b>             |                  |             | <b>&lt;0.001</b> |                 |             | <b>&lt;0.001</b> |
| None                                | 1                | -           |                  | 1               | -           |                  |
| ≤ 1 cm                              | 1.47             | (1.03-2.11) |                  | 1.60            | (0.90-2.83) |                  |
| > 1 cm                              | 1.86             | (1.33-2.60) |                  | 2.17            | (1.32-3.59) |                  |
| Not operated                        | 3.18             | (1.84-5.50) |                  | 3.10            | (1.47-6.54) |                  |
| <b>Tumor histology</b>              |                  |             | <b>0.1925</b>    |                 |             | <b>0.5092</b>    |
| High grade serous                   | 1                | -           |                  | 1               | -           |                  |
| Other                               | 1.29             | (0.88-1.89) |                  | 1.21            | (0.69-2.11) |                  |
| <b>Centre by N. of enrolled pts</b> |                  |             |                  |                 |             |                  |
| <25                                 | 1                | -           | 0.9698           | 1               | -           | 0.1457           |
| >25                                 | 0.99             | (0.75-1.31) |                  | 1.36            | (0.90-2.07) |                  |

**Table S3.** Univariate analysis of biomarkers (continuous and dummy for zero variables) for PFS and OS

|                                 | PFS (221 events) |             |       | OS (102 events) |             |       |
|---------------------------------|------------------|-------------|-------|-----------------|-------------|-------|
|                                 | HR               | (95% CI)    | P     | HR              | (95% CI)    | P     |
| <b>CXCR7:</b>                   |                  |             |       |                 |             |       |
| <b>Continuous variables</b>     |                  |             |       |                 |             |       |
| Epithelial                      | 0.93             | (0.86-1.01) | 0.106 | 0.99            | (0.88-1.10) | 0.821 |
| Stromal                         | 1.00             | (0.89-1.12) | 0.980 | 1.02            | (0.87-1.20) | 0.797 |
| <b>Dummy variables for zero</b> |                  |             |       |                 |             |       |
| Epithelial                      | 0.74             | (0.49-1.11) | 0.148 | 0.86            | (0.48-1.55) | 0.623 |
| Stromal                         | 0.94             | (0.65-1.35) | 0.728 | 0.99            | (0.58-1.69) | 0.969 |
| <b>CXCL12:</b>                  |                  |             |       |                 |             |       |
| <b>Continuous variables</b>     |                  |             |       |                 |             |       |
| Epithelial                      | 1.03             | (0.95-1.11) | 0.500 | 1.08            | (0.96-1.21) | 0.190 |
| Stromal                         | 1.10             | (0.81-1.49) | 0.535 | 0.94            | (0.56-1.57) | 0.810 |
| <b>Dummy variables for zero</b> |                  |             |       |                 |             |       |
| Epithelial                      | 0.85             | (0.61-1.2)  | 0.366 | 0.92            | (0.56-1.52) | 0.745 |
| Stromal                         | 1.57             | (0.8-3.06)  | 0.186 | 1.45            | (0.53-4.00) | 0.470 |
| <b>CXCR4:</b>                   |                  |             |       |                 |             |       |
| <b>Continuous variables</b>     |                  |             |       |                 |             |       |
| Epithelial                      | 0.94             | (0.87-1.02) | 0.143 | 0.98            | (0.87-1.09) | 0.678 |
| Stromal                         | 0.99             | (0.89-1.11) | 0.910 | 0.96            | (0.82-1.12) | 0.579 |
| <b>Dummy variables for zero</b> |                  |             |       |                 |             |       |
| Epithelial                      | 0.69             | (0.41-1.18) | 0.176 | 0.82            | (0.37-1.80) | 0.619 |
| Stromal                         | 0.95             | (0.67-1.35) | 0.783 | 0.87            | (0.52-1.45) | 0.594 |

**Table S4.** Analysis of biomarkers best cut-off adjusted for clinical characteristics for PFS and OS using Shrunk coefficients.

|                         | Shrunk coefficients       |             |       |                  |             |       |
|-------------------------|---------------------------|-------------|-------|------------------|-------------|-------|
|                         | Progression Free Survival |             |       | Overall Survival |             |       |
|                         | HR                        | (95% CI)    | p     | HR               | (95% CI)    | p     |
| <b>CXCR7 Epithelial</b> |                           |             |       |                  |             |       |
| > 36.7                  | 0.80                      | (0.37-1.76) | 0.586 | 1.01             | (0.16-6.29) | 0.992 |
| <b>CXCR7 Stromal</b>    |                           |             |       |                  |             |       |
| > 20.0                  | 1.20                      | (0.47-3.08) | 0.706 | 1.26             | (0.24-6.51) | 0.784 |
| <b>CXCL12Epithelial</b> |                           |             |       |                  |             |       |
| > 21.7                  | 1.24                      | (0.62-2.46) | 0.546 | 1.53             | (0.61-3.81) | 0.361 |
| <b>CXCL12 Stromal</b>   |                           |             |       |                  |             |       |
| > 6.7                   | 0.92                      | (0.15-5.63) | 0.930 | 0.81             | (0.1-6.83)  | 0.843 |
| <b>CXCR4 Epithelial</b> |                           |             |       |                  |             |       |
| > 130.0                 | 0.88                      | (0.35-2.27) | 0.799 | 0.87             | (0.16-4.69) | 0.871 |
| <b>CXCR4 Stromal</b>    |                           |             |       |                  |             |       |
| > 65.0                  | 0.91                      | (0.37-2.19) | 0.827 | 0.98             | (0.17-5.62) | 0.983 |



**Table S5.** Analysis of biomarkers (continuous and dummy for zero variables) adjusted for clinical characteristics for PFS and OS

|                                 | PFS (221 events) |             |        | OS (102 events) |             |        |
|---------------------------------|------------------|-------------|--------|-----------------|-------------|--------|
|                                 | HR               | (95% CI)    | P      | HR              | (95% CI)    | P      |
| <b>CXCR7:</b>                   |                  |             |        |                 |             |        |
| <b>Continuous variables</b>     |                  |             |        |                 |             |        |
| Epithelial                      | 0.94             | (0.85-1.03) | 0.1617 | 0.98            | (0.86-1.10) | 0.6976 |
| Stromal                         | 1.05             | (0.93-1.20) | 0.4326 | 1.09            | (0.91-1.30) | 0.3613 |
| <b>Dummy variables for zero</b> |                  |             |        |                 |             |        |
| Epithelial                      | 0.97             | (0.63-1.52) | 0.9064 | 1.14            | (0.60-2.18) | 0.6892 |
| Stromal                         | 0.88             | (0.60-1.30) | 0.5214 | 0.92            | (0.52-1.64) | 0.7824 |
| <b>CXCL12:</b>                  |                  |             |        |                 |             |        |
| <b>Continuous variables</b>     |                  |             |        |                 |             |        |
| Epithelial                      | 1.02             | (0.94-1.11) | 0.6341 | 1.07            | (0.94-1.21) | 0.2935 |
| Stromal                         | 1.16             | (0.85-1.57) | 0.3450 | 1.08            | (0.64-1.82) | 0.7771 |
| <b>Dummy variables for zero</b> |                  |             |        |                 |             |        |
| Epithelial                      | 0.86             | (0.59-1.27) | 0.4561 | 0.84            | (0.47-1.50) | 0.5566 |
| Stromal                         | 1.61             | (0.82-3.15) | 0.1647 | 1.82            | (0.64-5.20) | 0.2632 |
| <b>CXCR4:</b>                   |                  |             |        |                 |             |        |
| <b>Continuous variables</b>     |                  |             |        |                 |             |        |
| Epithelial                      | 0.98             | (0.90-1.06) | 0.5906 | 0.99            | (0.86-1.13) | 0.8703 |
| Stromal                         | 0.97             | (0.86-1.10) | 0.6411 | 0.97            | (0.81-1.18) | 0.7930 |
| <b>Dummy variables for zero</b> |                  |             |        |                 |             |        |
| Epithelial                      | 0.76             | (0.43-1.34) | 0.3483 | 0.82            | (0.34-1.96) | 0.6526 |
| Stromal                         | 0.94             | (0.65-1.36) | 0.7379 | 0.90            | (0.52-1.55) | 0.7078 |

**Table S6.** CXCR4, CXCL12 and CXCR7 expression and Response to treatment.

| Variable   | Response (No)<br>N = 48 | Response (Yes)<br>N = 146 | P-Value |
|------------|-------------------------|---------------------------|---------|
| CXCR7:     |                         |                           |         |
| Epithelial | 20 (0-60)               | 40 (10-76)                | 0.047   |
| Stromal    | 15 (0-40)               | 20 (0-43)                 | 0.527   |
| CXCL12:    |                         |                           |         |
| Epithelial | 29 (0-83)               | 13 (0-56)                 | 0.193   |
| Stromal    | 0 (0-0)                 | 0 (0-0)                   | 0.647   |
| CXCR4:     |                         |                           |         |
| Epithelial | 43 (9-67)               | 73 (38-93)                | <0.001  |
| Stromal    | 10 (0-31)               | 20 (0-43)                 | 0.072   |

Values are median (IQR); p-values were calculated with Wilcoxon rank test for zero-inflated data.
